# Supplementary material for: Immune gene signature delineates a subclass of thyroid cancer with unfavorable clinical outcomes
Source: publisher site journal article supplement (doi:10.18632/aging.102963), 2020-04-02
Supplement: Supplementary file [file aging-v12i7-102963-supplementary-material-SD2.pdf]

## SUPPLEMENTARY TABLE

**Supplementary Table 1. GO is performed on these 27 genes, and found that they were mainly concentrated in the cellular process and the metabolic process.**

| ID         | Description                                   | Count | GeneRatio | geneID                                                                                                               |
|------------|-----------------------------------------------|-------|-----------|----------------------------------------------------------------------------------------------------------------------|
| GO:0000003 | reproduction                                  | 1     | 27-Jan    | PTEN                                                                                                                 |
| GO:0008152 | metabolic process                             | 13    | 13/27     | ZFP62/CNOT6/FLT4/MGAT1/ATP6V1E1/CECR2/CSGALNACT2/FN3K/FN3KRP/PTEN/SLC25A18/TG/ZNF750                                 |
| GO:0001906 | cell killing                                  | 0     | 0/27      |                                                                                                                      |
| GO:0002376 | immune system process                         | 2     | 27-Feb    | IL17RA/BTNL8                                                                                                         |
| GO:0006791 | sulfur utilization                            | 0     | 0/27      |                                                                                                                      |
| GO:0006794 | phosphorus utilization                        | 0     | 0/27      |                                                                                                                      |
| GO:0040007 | growth                                        | 2     | 27-Feb    | SCGB3A1/PTEN                                                                                                         |
| GO:0007610 | behavior                                      | 1     | 27-Jan    | PTEN                                                                                                                 |
| GO:0008283 | cell proliferation                            | 4     | 27-Apr    | CNOT6/FLT4/SCGB3A1/PTEN                                                                                              |
| GO:0009758 | carbohydrate utilization                      | 0     | 0/27      |                                                                                                                      |
| GO:0009987 | cellular process                              | 18    | 18/27     | OR2Y1/ZFP62/CNOT6/FLT4/MGAT1/SCGB3A1/IL17RA/ATP6V1E1/BTNL8/CECR2/CSGALNACT2/FN3K/FN3KRP/PTEN/SLC25A18/TBCD/TG/ZNF750 |
| GO:0015976 | carbon utilization                            | 0     | 0/27      |                                                                                                                      |
| GO:0019740 | nitrogen utilization                          | 0     | 0/27      |                                                                                                                      |
| GO:0022414 | reproductive process                          | 1     | 27-Jan    | PTEN                                                                                                                 |
| GO:0022610 | biological adhesion                           | 2     | 27-Feb    | PTEN/TBCD                                                                                                            |
| GO:0023052 | signaling                                     | 9     | 27-Sep    | OR2Y1/CNOT6/FLT4/SCGB3A1/IL17RA/ATP6V1E1/BTNL8/PTEN/TG                                                               |
| GO:0032501 | multicellular organismal process              | 8     | 27-Aug    | OR2Y1/FLT4/MGAT1/IL17RA/CECR2/PTEN/TBCD/TG                                                                           |
| GO:0032502 | developmental process                         | 9     | 27-Sep    | FLT4/MGAT1/SCGB3A1/CECR2/FN3K/PTEN/TBCD/TG/ZNF750                                                                    |
| GO:0040011 | locomotion                                    | 3     | 27-Mar    | FLT4/IL17RA/PTEN                                                                                                     |
| GO:0043473 | pigmentation                                  | 0     | 0/27      |                                                                                                                      |
| GO:0044848 | biological phase                              | 0     | 0/27      |                                                                                                                      |
| GO:0048511 | rhythmic process                              | 1     | 27-Jan    | PTEN                                                                                                                 |
| GO:0048518 | positive regulation of biological process     | 7     | 27-Jul    | CNOT6/FLT4/SCGB3A1/IL17RA/BTNL8/PTEN/ZNF750                                                                          |
| GO:0048519 | negative regulation of biological process     | 5     | 27-May    | CNOT6/FLT4/SCGB3A1/PTEN/TBCD                                                                                         |
| GO:0050789 | regulation of biological process              | 12    | 27-Dec    | OR2Y1/ZFP62/CNOT6/FLT4/SCGB3A1/IL17RA/ATP6V1E1/BTNL8/PTEN/TBCD/TG/ZNF750                                             |
| GO:0050896 | response to stimulus                          | 10    | 27-Oct    | OR2Y1/CNOT6/FLT4/SCGB3A1/IL17RA/ATP6V1E1/BTNL8/PTEN/SLC25A18/TG                                                      |
| GO:0051179 | localization                                  | 7     | 27-Jul    | FLT4/IL17RA/ATP6V1E1/CECR2/PTEN/SLC25A18/TG                                                                          |
| GO:0051704 | multi-organism process                        | 2     | 27-Feb    | IL17RA/PTEN                                                                                                          |
| GO:0065007 | biological regulation                         | 12    | 27-Dec    | OR2Y1/ZFP62/CNOT6/FLT4/SCGB3A1/IL17RA/ATP6V1E1/BTNL8/PTEN/TBCD/TG/ZNF750                                             |
| GO:0071840 | cellular component organization or biogenesis | 5     | 27-May    | CNOT6/SCGB3A1/CECR2/PTEN/TBCD                                                                                        |
| GO:0098743 | cell aggregation                              | 0     | 0/27      |                                                                                                                      |
| GO:0098754 | detoxification                                | 0     | 0/27      |                                                                                                                      |
